# Supplementary material for: Azacitidine front-line in 339 patients with myelodysplastic syndromes and acute myeloid leukaemia: comparison of French-American-British and World Health Organization classifications
Source: J Hematol Oncol. 2016 Apr 16;9:39. doi: 10.1186/s13045-016-0263-4 (PMC4833933; doi:10.1186/s13045-016-0263-4)
Supplement: Additional file 1: Table S1. — FAB and WHO classifications of MDS and AML. (DOC 37 kb) [file 13045_2016_263_MOESM1_ESM.doc]

Additional file 1: Table S1. FAB and WHO-classifications of MDS and AML.

| FAB-classification | PB anomalies | BM anomalies |
| --- | --- | --- |
| RAEB | - Cytopenia(s) - 2–<5% blasts - No Auer rods - Monocytes <1.000/µL | - Unilineage or multlineage dysplasia - 5–20% blasts - No Auer rods - Ringed sideroblasts >15% +/- |
| RAEB-t | - Cytopenia(s) - ≥5% and <30% blasts1 - Auer rods +/- - Monocytes >1.000/µL +/- | - Unilineage or multlineage dysplasia - 21–30% blasts - Auer rods +/- - Ringed sideroblasts >15% +/- |
| AML | - Cytopenia(s) - ≥30% blasts1 - Auer rods +/- - Monocytes >1.000/µL +/- | - >30% blasts - Auer rods +/- - Ringed sideroblasts >15% +/- |
| WHO-classification | PB anomalies | BM anomalies |
| RAEB-I | - Cytopenia(s) - 2–<5% blasts2 - No Auer rods - Monocytes <1.000/µL | - Cytopenia(s) - 2<5% blasts2 - No Auer rods - Ringed sideroblasts >15% +/- |
| RAEB-II | - Cytopenia(s) - 5–19% blasts - Auer rods +/-3 - Monocytes <1.000/µL | - Unilineage or multlineage dysplasia - 10–19% blasts - Auer rods +/- - Ringed sideroblasts >15% +/- |
| AML | - Cytopenia(s) - ≥20% blasts1 - Auer rods +/- - Monocytes >1.000/µL +/- | - ≥20% blasts4,5 - Auer rods +/- - Ringed sideroblasts >15% +/- |

1In the absence of BM blasts (‘peripheral leukemia’).

2If BM blasts <5% but PB blasts are 2–4%, the diagnostic classification is RAEB-I.

3Cases with Auer rods and <5% PB blasts and <10% BM blasts should be classified as RAEB-II.

4Exceptions to this include leukemias with certain genetic abnormalities, such as those with t(8;21), inv(16), or t(15;17), and myeloid sarcoma, which are considered diagnostic of AML without regard to the BM blast count.

5The leukemic cells must be of myeloid origin as demonstrated by either the presence of Auer rods, cytochemical positivity for myeloperoxidase, or presence of sufficient myeloid markers recognized by immunophenotyping.
